# Supplementary material for: Ultrasensitive room-temperature ethanol detection based on Au functionalized nanoporous SnO2/C60/SnO2 composites
Source: Royal Society of Chemistry journal article supplement (doi:10.1039/c7ra11021a), 2017-01-01
Supplement: c7ra11021a1.pdf [file c7ra11021a1.pdf]

## Supplementary Information

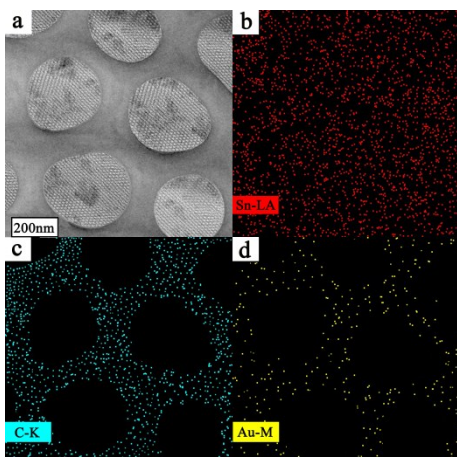

Fig. S1. (a) STEM image of Au@SnO<sub>2</sub>/C<sub>60</sub>/SnO<sub>2</sub> nanocomposite film and (b, c, d) corresponding elemental maps of Sn, C and Au elements.

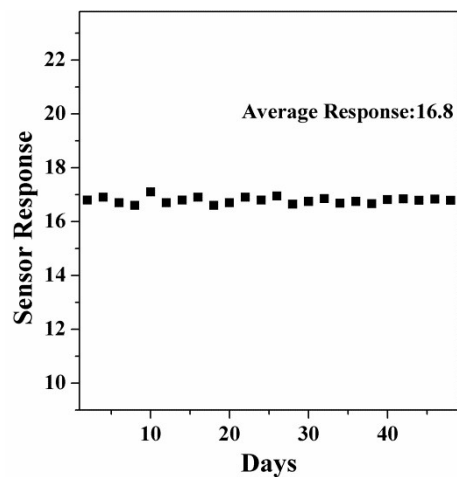

5

Fig. S2 Long-term stability of response of the ethanol gas sensor based on Au@SnO<sub>2</sub>/C<sub>60</sub>/SnO<sub>2</sub> nanocomposite film in 0.5 ppm of ethanol gas.

Table S1 Ethanol sensor response of the recently developed semiconductor sensors consisting of a variety of materials.

| Sensing materials                                | Temperature (°C) | C <sub>ethanol</sub> (ppm) | S (R <sub>s</sub> /R <sub>g</sub> ) | Response time (s) |
|--------------------------------------------------|------------------|----------------------------|-------------------------------------|-------------------|
| SnO <sub>2</sub> /RGO film <sup>10</sup>         | 300              | 0.5                        | 0.5                                 | \                 |
| SnO <sub>2</sub> -TiO <sub>2</sub> <sup>37</sup> | 43               | 1                          | 1.2                                 | 2400              |
| Ag@SnO <sub>2</sub> <sup>35</sup>                | RT               | 0.5                        | 0.3                                 | 52                |
| RGO/SnO <sub>2</sub> <sup>38</sup>               | RT               | 0.5                        | 0.2                                 | 300               |
| SnO <sub>2</sub> -PDDAC <sup>39</sup>            | RT               | 1                          | 0.3                                 | 88                |
| Porous C/SnO <sub>2</sub> <sup>11</sup>          | RT               | 0.5                        | 2.4                                 | 100               |
| In this work                                     | RT               | 0.5                        | 16.8                                | 36                |

10
